# Supplementary material for: Enhanced catalytic performance of zinc oxide nanorods with crystal plane control
Source: Royal Society of Chemistry journal article supplement (doi:10.1039/c9ce01073d), 2019-01-01
Supplement: c9ce01073d1.pdf [file c9ce01073d1.pdf]

## Supporting Information

### Enhanced catalytic performance of zinc oxide nanorods with crystal plane control

Tong Zhou, Min Hu, Jia He, Ruicong Xie, Cuihua An\*, Chao Li\*, and Jun Luo  
Tianjin Key Laboratory of Advanced Functional Porous Materials, Institute for New Energy Materials and Low-Carbon Technologies, School of Materials Science and Engineering, Tianjin University of Technology, Tianjin 300384, P.R. China.

#### Corresponding Author

\*Correspondence and requests for materials should be addressed to:  
[chao\\_li@tjut.edu.cn](mailto:chao_li@tjut.edu.cn); [ancuihua@tjut.edu.cn](mailto:ancuihua@tjut.edu.cn)

#### Supplementary Figures

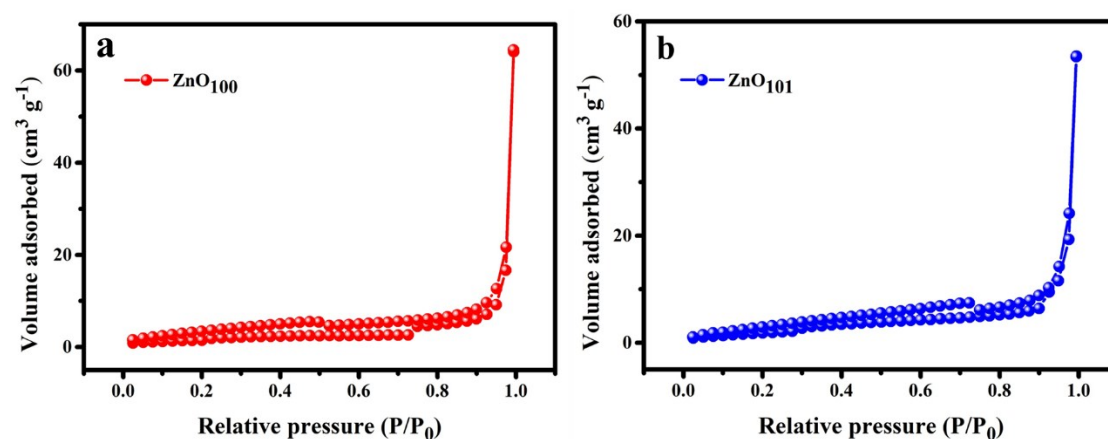

Fig. S1. Nitrogen adsorption-desorption isotherms of (a) ZnO<sub>101</sub> and (b) ZnO<sub>100</sub>

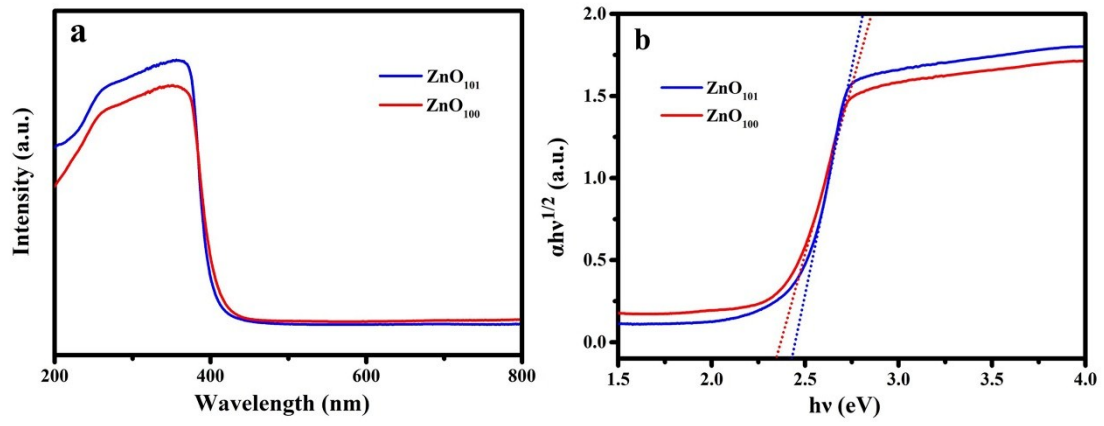

Fig. S2. (a) UV-visible diffuse reflectance spectra and (b) Tauc plots of  $\alpha h\nu^{1/2}$  vs.  $h\nu$  for ZnO<sub>101</sub> and ZnO<sub>100</sub>
